# Supplementary material
Source: publisher figshare collection journal article supplement (https://gsapubs.figshare.com/ndownloader/files/22747484)
Supplement: Supplementary file 1 [file 22747484]

***Supplementary material DR1: Degassing during contact metamorphism as an explanation of the negative carbon isotope excursion associated with the emplacement of the Emeishan LIP***

Our measurements of the  $\delta^{13}\text{C}$  of dolostones from the Sinian formation range from +4.7 to -1.1, values which are consistent with Jacobsen and Kaufman's (1998) estimate of  $\delta^{13}\text{C}$  in Neoproterozoic seawater (+4 to -4 ‰, with most of the data between +2 and -2 ‰). If we assume that (1) end-Guadalupian seawater contained ~40000 Gt C with  $\delta^{13}\text{C} = +5$  ‰ (Berner, 2005), (2) end-Guadalupian atmosphere contained ~2850 Gt C (Rothman 2002) with  $\delta^{13}\text{C} = -2$  ‰ (7 ‰ more negative than seawater (Mora et al. 1996)), then the average  $\delta^{13}\text{C}$  of the ocean-atmosphere system was +4.5.

After the addition of 16800 Gt of magmatic  $\text{CO}_2$  (4580 Gt C with  $\delta^{13}\text{C} = -6$ ), 62500 Gt of  $\text{CO}_2$  from destabilized Sinian dolostone (17000 Gt C with  $\delta^{13}\text{C} = 0$ ) and potentially 84000 Gt  $\text{CO}_2$  from the metamorphism of organic carbon (=22900 Gt C with  $\delta^{13}\text{C} \sim -22$ ), the bulk composition of the ocean-atmosphere system is changed to between  $\delta^{13}\text{C} = +2.6$  ‰ (if no organic contribution) and -3.9 (if 22900 Gt C from the metamorphism of organic carbon was added with  $\delta^{13}\text{C} \sim -22$ ). If we then assume that ocean-atmosphere equilibrium is rapid (flux ~90 Gt/y as current estimation) and the difference between the carbon isotope compositions of ocean and atmosphere is fixed at the timescales we consider ( $\delta^{13}\text{C}_{\text{atm}} = \delta^{13}\text{C}_{\text{ocean}} - 7$  ‰), as supposed by Mora (1996) and Beerling et al. (2002), then the effect of emplacement of the Emeishan LIP in the Sinian Basin is a negative carbon excursion for the ocean-atmosphere system from an average of  $\delta^{13}\text{C} = -2$  before the degassing to an average of  $\delta^{13}\text{C} = -4.4$  to -10.9 after degassing.

## References cited

- Beerling, D.J., Lake, J.A., Berner, R.A., Hickey, L.J., Taylor D.W., and Royer D.L., 2002, Carbon isotope evidence implying high O<sub>2</sub>/CO<sub>2</sub> ratios in the Permian-Carboniferous atmosphere. *Geochimica et Cosmochimica Acta*, v. 66, p. 3757-3767, doi: 10.1016/S0016-7037(02)00901-8.
- Berner, R.A., 2005, The carbon and sulphur cycles and atmospheric oxygen from middle Permian to middle Triassic: *Geochimica et Cosmochimica Acta*, v. 69, p. 3211-3217, doi: 10.1016/j.gca.2005.03.021.
- Jacobsen, S.B., and Kaufman, A.J., 1999, The Sr, C and O isotopic evolution of Neoproterozoic seawater: *Chemical Geology*, v. 161, p. 37-57, doi: 10.1016/S0009-2541(99)00080-7.
- Mora, C.I., Driese, S.G., and Colarusso, L.A., 1996, Middle to Late Paleozoic Atmospheric CO<sub>2</sub> Levels from Soil Carbonate and Organic Matter: *Science*, v. 271, p. 1105-1107, doi: 10.1126/science.271.5252.1105.

**Supplementary material DR2: An overview of reactions in a metamorphic aureole in a sedimentary basin**

The amount of gas released during metamorphism depends on the type of sediment and its chemical composition, and on the conditions (P,T, Xfluid) of metamorphism.

- At the highest temperatures, calcite melts incongruently to CaO and CO<sub>2</sub>. Solid or liquid calcite is assimilated into the magma where it reacts to Ca which is absorbed in the magma or overlying rocks and CO<sub>2</sub>, which degasses.
- Thermal decomposition of pure anhydrite ( $\text{CaSO}_4 = \text{CaO} + \text{SO}_2 + \frac{1}{2} \text{O}_2$ ) begins at 1100°C and reacts readily only at temperatures around 1400 °C. Impure anhydrite containing clay, graphite or carbon monoxide reacts at temperatures well below 1000°C ( $2\text{CaSO}_4 + \text{C} = 2\text{CaO} + \text{CO}_2 + 2\text{SO}_2$  and  $\text{CaSO}_4 + \text{CO} = \text{CaO} + \text{CO}_2 + \text{SO}_2$ ). Kuusik et al. (1985) report thermal decomposition of anhydrite in CO/N mixtures at 900 °C. Impurities such as SiO<sub>2</sub> lower the decomposition temperatures by up to 100 °C. West and Sutton (1954) report decomposition of anhydrite with 20% added carbon at 615°C in a nitrogen atmosphere.
- Thermal decomposition of pure limestone ( $\text{CaCO}_3 = \text{CaO} + \text{CO}_2$ ) strongly depends on the water content. In the absence of water, decomposition starts only at high temperature, around 1200°C; when aqueous fluid is present, the temperature is lower (~700°C).
- Dolomite reacts to calcite, periclase and CO<sub>2</sub> ( $\text{CaMg}(\text{CO}_3)_2 = \text{CaCO}_3 + \text{MgO} + \text{CO}_2$ ) at 700°C. In the presence of aqueous fluid the temperature decreases to below ~450°C
- Calc-silicates containing forsterite and diopside form from impure limestones and marls. These reactions release considerable CO<sub>2</sub> and proceed at relatively low temperatures, between 450 and 500°C.

26 • Organic matter in carbonates or shales releases CH<sub>4</sub> and/or CO<sub>2</sub>. Cracking of  
27 hydrocarbons starts at ~100°C and reaches a maximum around 550 °C.

28 • Other gases are released from specific sediment types. Salts break down to  
29 halogens; pyrite in sulfide-rich shales oxidises or breaks down to Fe-oxide releasing  
30 sulfur oxides; coal burns to release CO<sub>2</sub>.

31 The reactions within an aureole thus release a series of greenhouse or toxic gases,  
32 including CO<sub>2</sub>, SO<sub>2</sub>, CH<sub>4</sub>, and halogens, as summarized in Figure 2.

33

#### 34 References cited

35 Kuusik, R., Saikkonen, P., and Niinisto, L., 1985, Thermal decomposition of calcium  
36 sulfate in carbon monoxide: Journal Thermal Analysis and Calorimetry, v. 30,  
37 p. 187-193.

38

39

40
